# Supplementary material for: Self-assembled photoactive heterojunction phase gradient
Source: Royal Society of Chemistry journal article supplement (doi:10.1039/c4ta00324a), 2014-01-01
Supplement: c4ta00324a1.pdf [file c4ta00324a1.pdf]

Electronic Supplementary Materials (ESI) for Journal of Materials Chemistry A  
This journal is ©The Royal Society of Chemistry 2013

## Supporting Information for “Self-assembled photoactive heterojunction phase gradient”

G. Merle,<sup>a</sup> D. C. Bassett,<sup>a</sup> J. A. Finch,<sup>b</sup> G. Demopoulos,<sup>b</sup> and J. E. Barralet<sup>a, c</sup>

<sup>a</sup> Faculty of Dentistry, McGill University, Montreal, H3A 2B2, (Canada).

<sup>b</sup> Department of Mining and Materials Engineering, McGill University, Montreal, H3A 0C5, (Canada)

<sup>c</sup> Department of Surgery, Montreal General Hospital, Faculty of Medicine, McGill University, Montreal, (Canada)

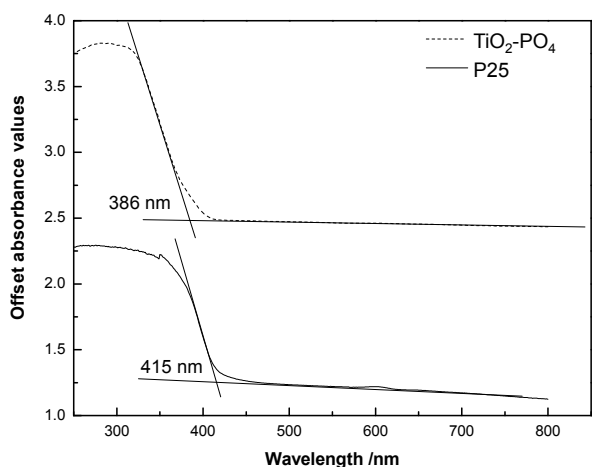

**Figure S1:** Comparison of diffuse reflectance spectra of 88:1 TiO<sub>2</sub>-PO<sub>4</sub> sample and P25

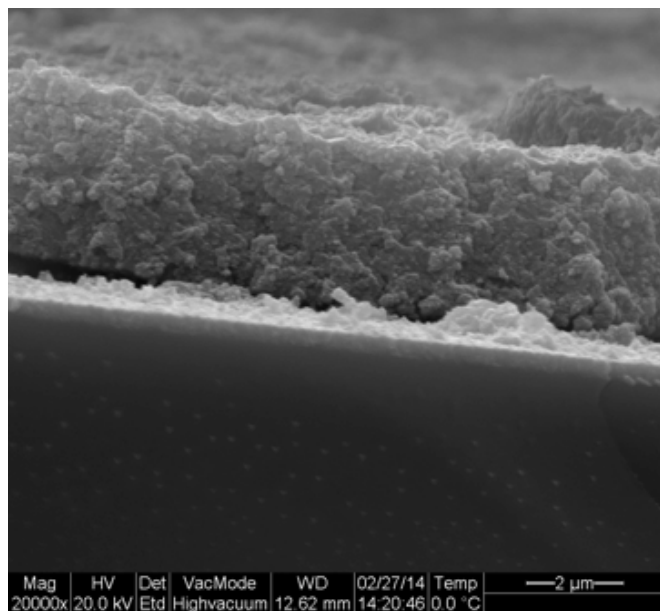

**Figure S2:** Scanning electron micrograph of a cross section of the P25 film after heat treatment.

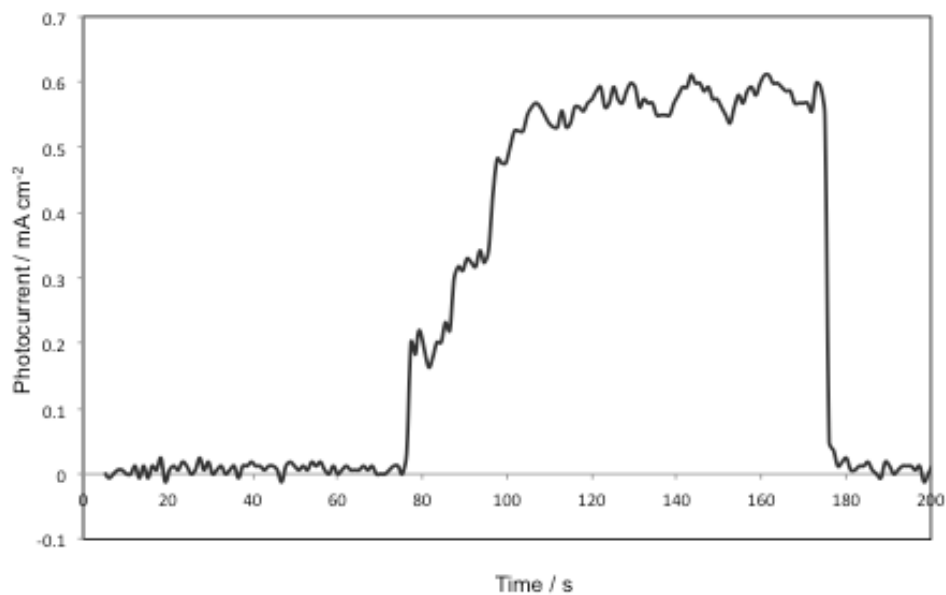

**Figure S3.** Current density–time characteristics curve measured upon illumination and in the dark of the as-prepared photo-anodes at 250 seconds with phase pure anatase.

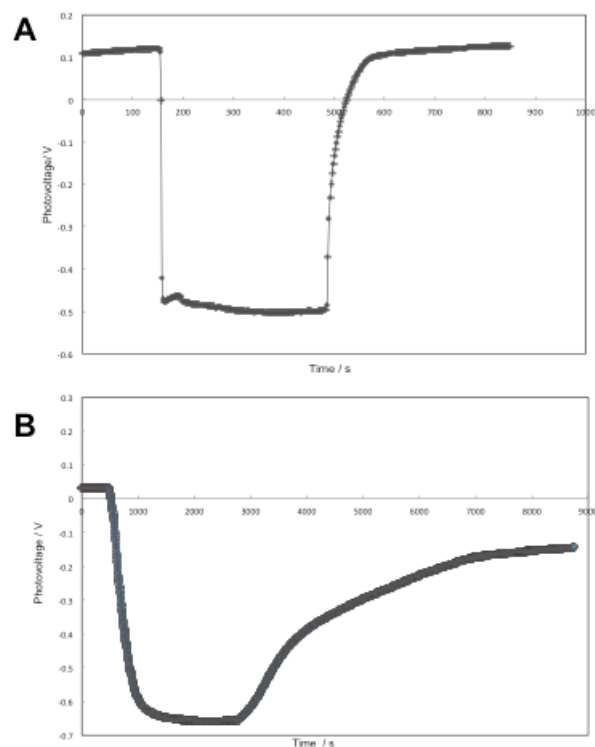

**Figure S4.** Photovoltage decay after illumination of the as-prepared photo-anodes with unsensitised A: P25 and B:  $\text{TiO}_2\text{-PO}_4$  photoelectrodes

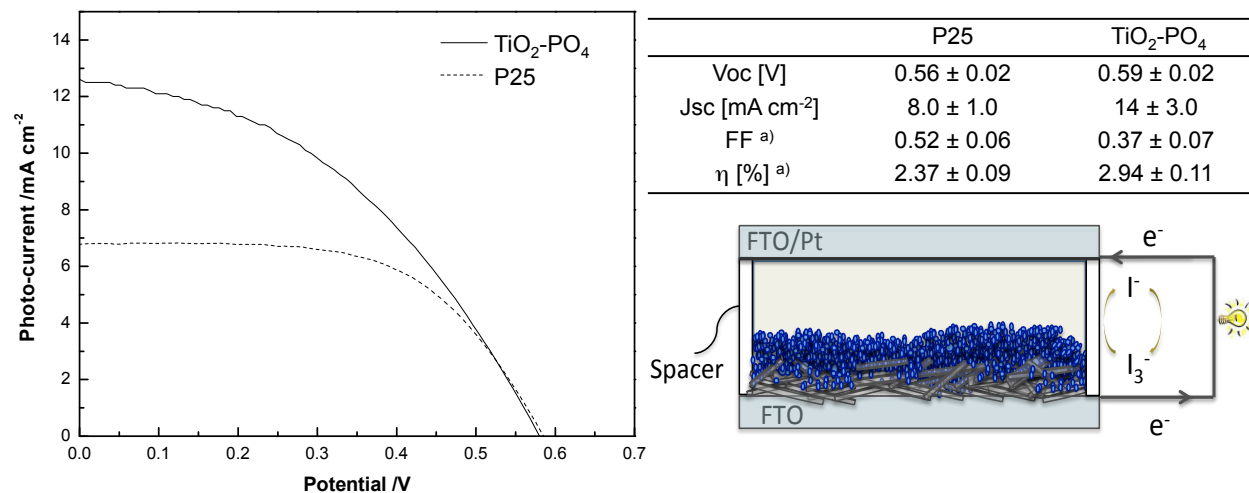

**Figure S5:** Current-voltage curves of the dye-sensitized solar cells based on the 88:1  $\text{TiO}_2\text{-PO}_4$  and pure P25 electrodes and mean of the solar cell parameters (N=3): Open Circuit Voltage,  $V_{oc}$ ,

Electronic Supplementary Materials (ESI) for Journal of Materials Chemistry A  
This journal is ©The Royal Society of Chemistry 2013

Short Circuit Current,  $J_{sc}$ , Fill Factor, FF and photovoltaic conversion efficiency,  $\eta$ . Schematic diagram illustrating configuration of DSSC.
